# Supplementary material for: Bisphenol S Impaired In Vitro Ovine Early Developmental Oocyte Competence
Source: PubMed Central journal article supplement (PMC7072985; doi:10.3390/ijms21041238), 2020-02-12
Supplement: ijms-21-01238-s001.pdf [file ijms-21-01238-s001.pdf]

**A**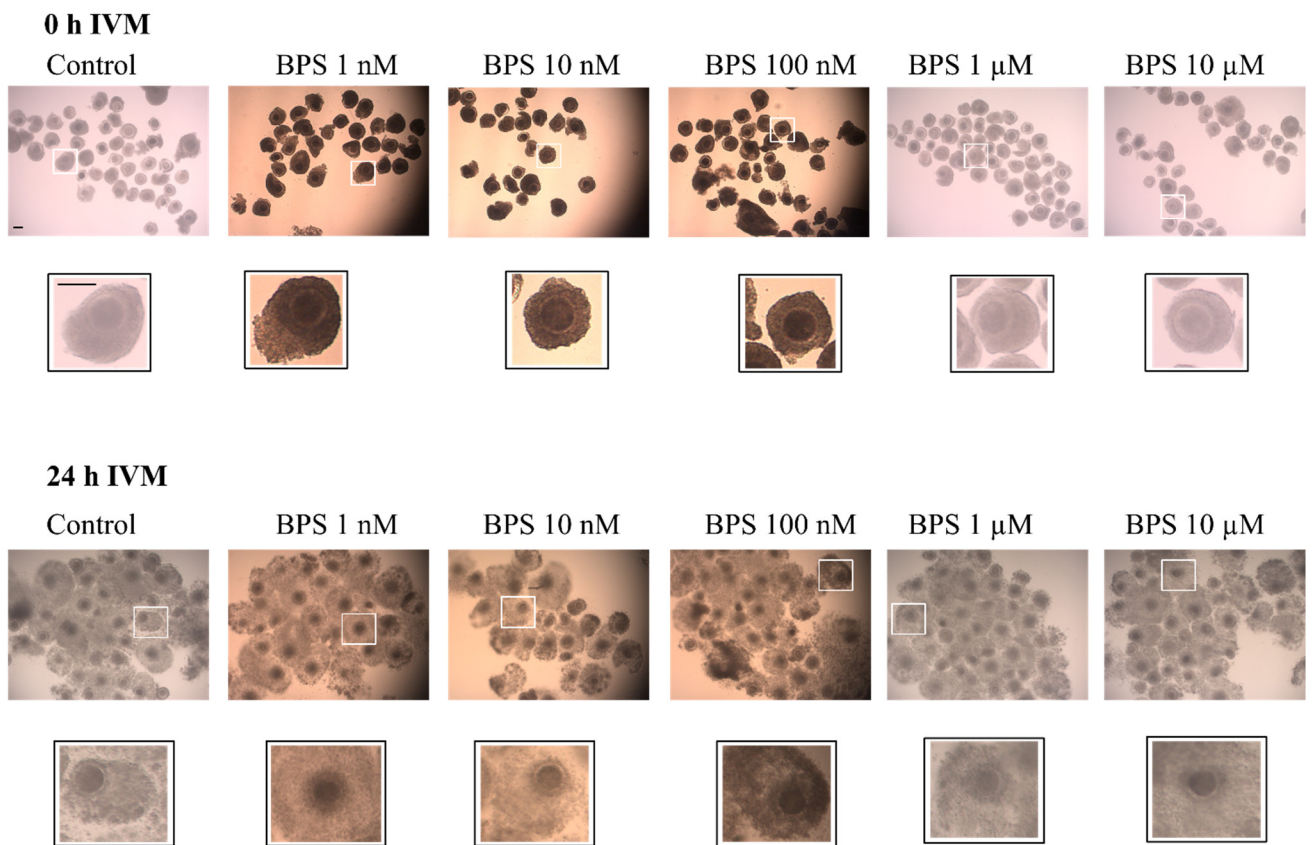**B**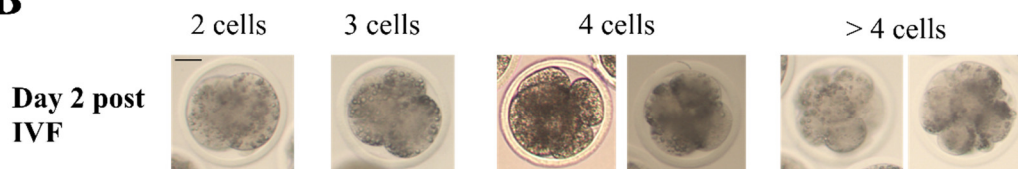**C**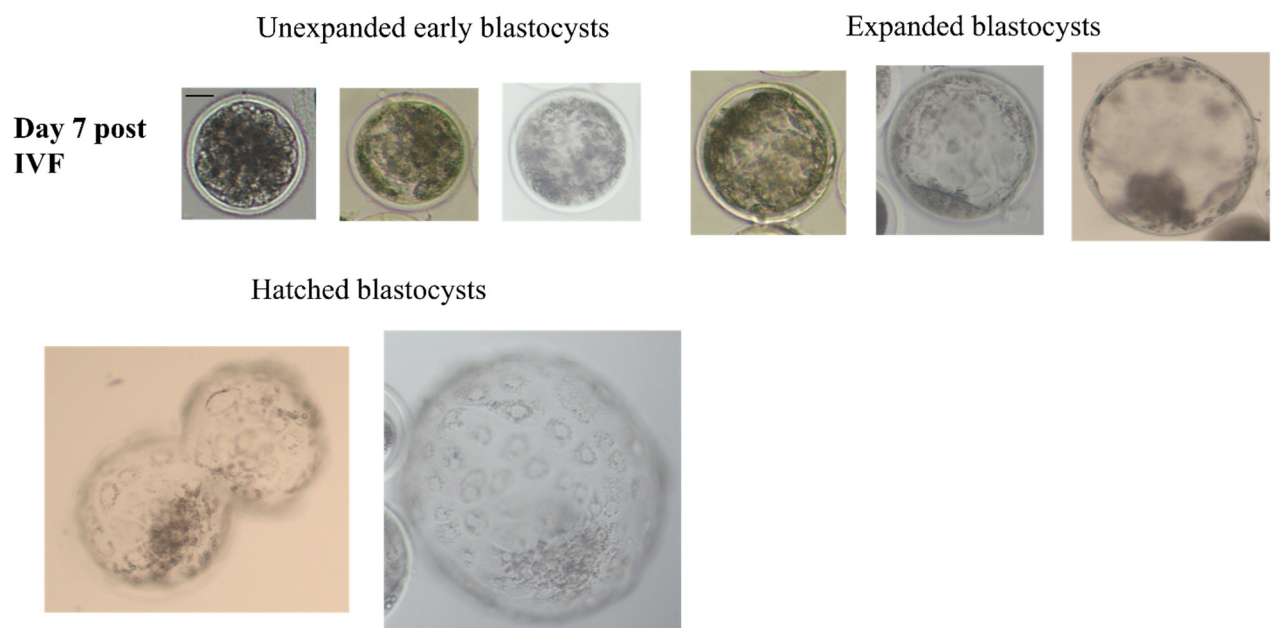

**Figure S1.** Development of cumulus oocyte complexes and embryos during *in vitro* maturation and *in vitro* development post IVF. Morphology was observed under microscopy 40× and 100× for IVM and for IVD respectively. **A.** COC underwent 24 h IVM in the presence or absence of BPS (1 nM, 10 nM, 100 nM, 1 μM or 10 μM). Scale bar represents 100 μm. **B.** Oocytes were subjected to IVF, and the cleavage rate was assessed 2 days after IVF. Embryos with more than 4 cells were distinguished from embryos with 2-4 cells. Scale bar represents 40 μm **C.** Blastocyst rate was evaluated 7 days after IVF. Blastocysts were classified as unexpanded early, expanded or hatched. Scale bar represents 40 μm.

**A**

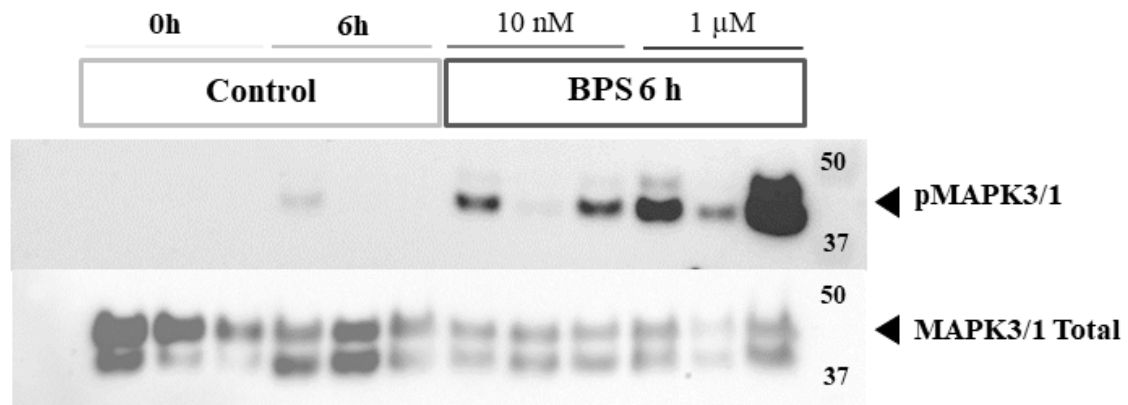

**B**

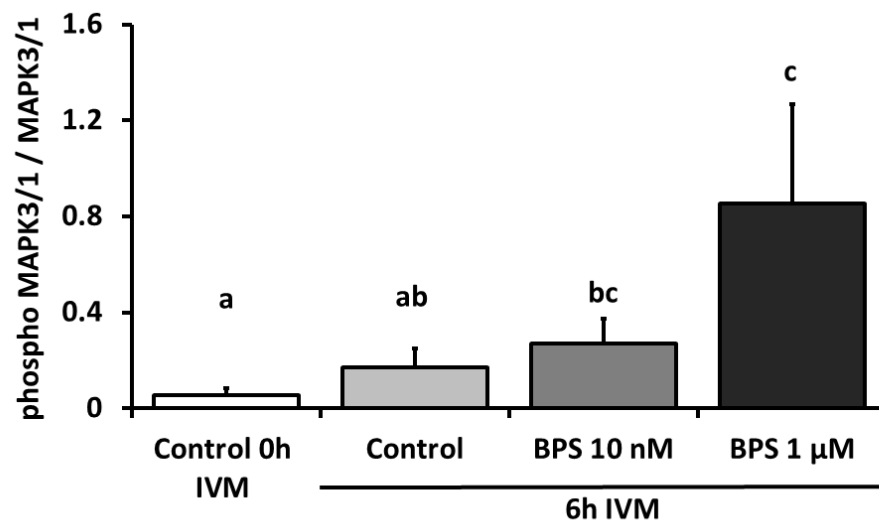

**Figure S2.** Western blot analysis of MAPK3/1 signalling pathway activation in oocytes after BPS exposure. COC underwent IVM for 6 h in the presence or absence of BPS (10 nM or 1 μM). After 6-h IVM, groups of 30 oocytes were denuded. Proteins were then extracted and separated by electrophoresis on 4–12% (*w:v*) sodium dodecyl sulphate polyacrylamide gels. After electrotransfer to nitrocellulose membranes, the proteins were probed with anti-phospho-MAPK3/1 and anti-MAPK3/1 antibodies. **A.** Representative blots and bands are presented in this figure. **B.** Bands on the blots were quantified and the phospho/total protein ratio was calculated. Results are expressed relative to the control as mean ± SEM of nine independent samples per condition. Different letters indicate significant differences ( $p \leq 0.05$ ).

| Name                                                      | Species Specificity | Source                     | Supplier (Distributor, Town, Country)                             | Reference |
|-----------------------------------------------------------|---------------------|----------------------------|-------------------------------------------------------------------|-----------|
| MAPK3/1 (ERK1/2)                                          | Rat                 | Rabbit polyclonal antibody | Cell Signaling Technology (Ozyme, Saint Quentin Yvelines, France) | 9102      |
| Phospho-MAPK3/1 (ERK1/2) (Thr202/Tyr204, D13.14.4E, XPTM) | Human               | Rabbit monoclonal antibody | Cell Signaling Technology (Ozyme, Saint Quentin Yvelines, France) | 4370      |
| Vinculine                                                 | Human               | Mouse monoclonal antibody  | Sigma Aldrich Saint Quentin Fallavier                             | V9131     |

**Table S1: Characteristics of primary antibodies used for western blotting**

**Table S2.** Results of logistic regression analysis and presenting therefore estimated % of the model comparing all conditions at the same time on the effect of BPS during IVM on *in vitro* embryo development after *in vitro* fertilization, and taking into account both treatment and experiment effects (logistic regression model estimated %  $\pm$  sem)

| Conditions       |                | Mature COC | Cleaved embryos | 2-4 cells embryos | > 4 cells embryos | Blastocysts    | Unexpanded early blastocysts | Expanded Blastocysts | Hatched blastocysts |
|------------------|----------------|------------|-----------------|-------------------|-------------------|----------------|------------------------------|----------------------|---------------------|
| <b>Control</b>   | N              | 370        | 202             | 81                | 121               | 44             | 10                           | 15                   | 19                  |
|                  | %              |            | 57.4 $\pm$ 6.1  | 21.6 $\pm$ 3.1    | 33.6 $\pm$ 4.7    | 22.2 $\pm$ 3.5 | 3.8 $\pm$ 1.9                | 7.4 $\pm$ 1.9        | 9.4 $\pm$ 2.1       |
| <b>BPS 1nM</b>   | N              | 281        | 197             | 69                | 128               | 37             | 5                            | 16                   | 16                  |
|                  | %              |            | 71.7 $\pm$ 5.4  | 23.5 $\pm$ 3.5    | 45.6 $\pm$ 5.3    | 18.7 $\pm$ 3.2 | 1.8 $\pm$ 1.1                | 8.0 $\pm$ 2.0        | 8.1 $\pm$ 2.0       |
|                  | <b>p-value</b> |            | <b>0.0003</b>   | 0.564             | <b>0.0025</b>     | 0.3918         | 0.176                        | 0.819                | 0.6474              |
| <b>BPS 10nM</b>  | N              | 298        | 183             | 79                | 104               | 26             | 4                            | 12                   | 10                  |
|                  | %              |            | 61.2 $\pm$ 6.1  | 25.6 $\pm$ 3.6    | 33.3 $\pm$ 4.8    | 14.2 $\pm$ 2.9 | 1.9 $\pm$ 1.2                | 6.4 $\pm$ 1.9        | 5.4 $\pm$ 1.7       |
|                  | <b>p-value</b> |            | 0.335           | 0.227             | 0.942             | <b>0.0458</b>  | 0.246                        | 0.720                | 0.150               |
| <b>BPS 100nM</b> | N              | 296        | 167             | 62                | 105               | 33             | 7                            | 11                   | 15                  |
|                  | %              |            | 55.0 $\pm$ 6.3  | 19.6 $\pm$ 3.1    | 33.6 $\pm$ 4.8    | 20.4 $\pm$ 3.6 | 4.3 $\pm$ 2.3                | 6.5 $\pm$ 2.0        | 8.9 $\pm$ 2.3       |
|                  | <b>p-value</b> |            | 0.561           | 0.537             | 0.980             | 0.674          | 0.786                        | 0.752                | 0.882               |
| <b>BPS 1uM</b>   | N              | 319        | 152             | 77                | 75                | 19             | 6                            | 8                    | 5                   |
|                  | %              |            | 45.9 $\pm$ 6.3  | 23.0 $\pm$ 3.3    | 21.8 $\pm$ 3.8    | 12.1 $\pm$ 2.9 | 3.3 $\pm$ 1.9                | 5.1 $\pm$ 1.8        | 3.3 $\pm$ 1.5       |
|                  | <b>p-value</b> |            | <b>0.0041</b>   | 0.657             | <b>0.0008</b>     | <b>0.0168</b>  | 0.814                        | 0.382                | <b>0.0315</b>       |
| <b>BPS 10uM</b>  | N              | 321        | 163             | 74                | 89                | 24             | 7                            | 12                   | 5                   |
|                  | %              |            | 50.7 $\pm$ 6.3  | 22.2 $\pm$ 3.3    | 26.7 $\pm$ 4.3    | 14.7 $\pm$ 3.1 | 3.6 $\pm$ 1.9                | 7.2 $\pm$ 2.1        | 3.1 $\pm$ 1.4       |
|                  | <b>p-value</b> |            | <b>0.0923</b>   | 0.842             | <b>0.0574</b>     | <b>0.0715</b>  | 0.918                        | 0.953                | <b>0.0212</b>       |

N: Number of samples ; % is the % estimated by the logistic regression model  $\pm$  sem ; p-value is the logistic regression p-value of the comparison to the control condition ; bold characters indicate significant differences  $p \leq 0.05$  ; italic and bold characters indicate tendencies  $0.05 < p < 0.1$
